# Supplementary material for: Polymer functionalized magnetic nanoconstructs for immunomagnetic separation of analytes
Source: Royal Society of Chemistry journal article supplement (doi:10.1039/c6ra14236b), 2016-01-01
Supplement: c6ra14236b1.pdf [file c6ra14236b1.pdf]

**Supplementary file**

**Polymer Functionalized Magnetic Nanoconstructs for Immunomagnetic Separation of  
Analyte**

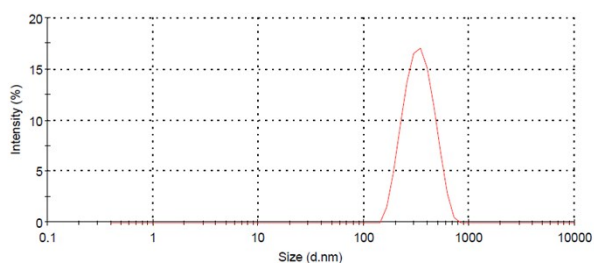

**(a) PFMNC-6**

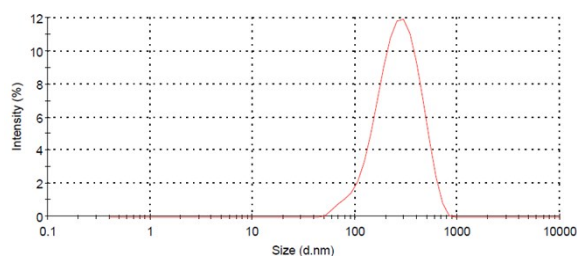

**(b) PFMNC-9**

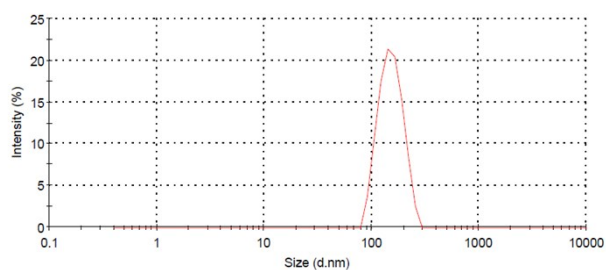

**(c) PFMNC-12**

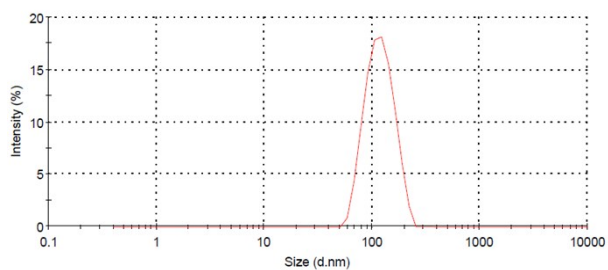

**(d) PFMNC-15**

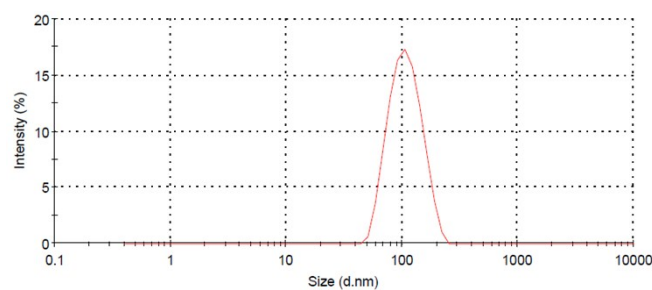

**(e) PFMNC-21**

**Fig. S1: Size distribution plot of various PFMNCs with different iron oxide concentrations**

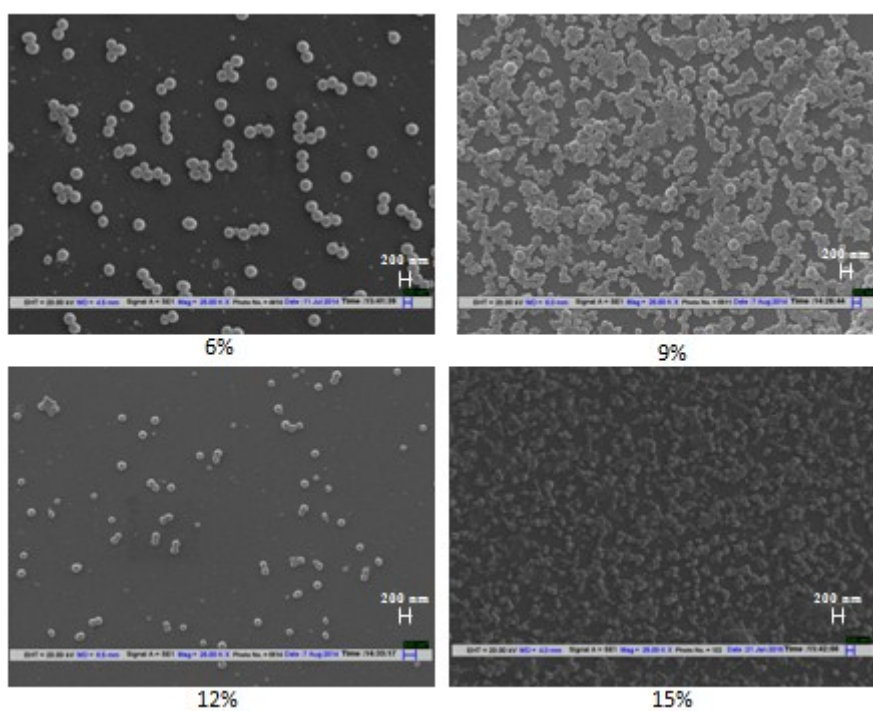

Fig.S2: SEM analysis of various synthesized polymeric nanoconstructs

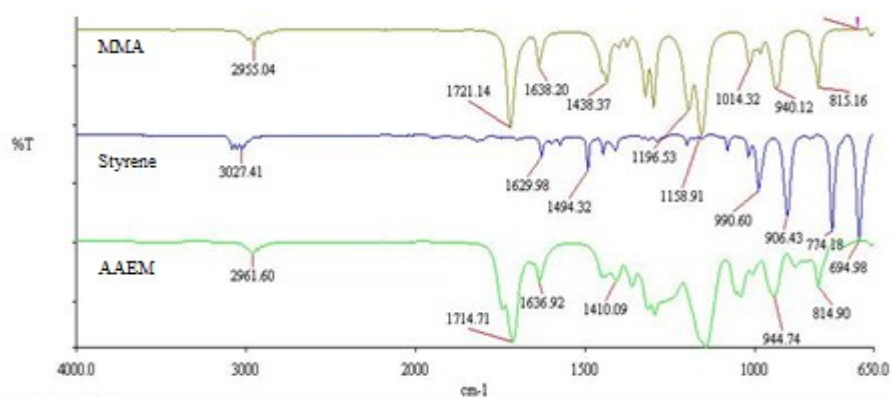

Fig. S3: FTIR spectra of constituent monomers Styrene, MMA and AAEM

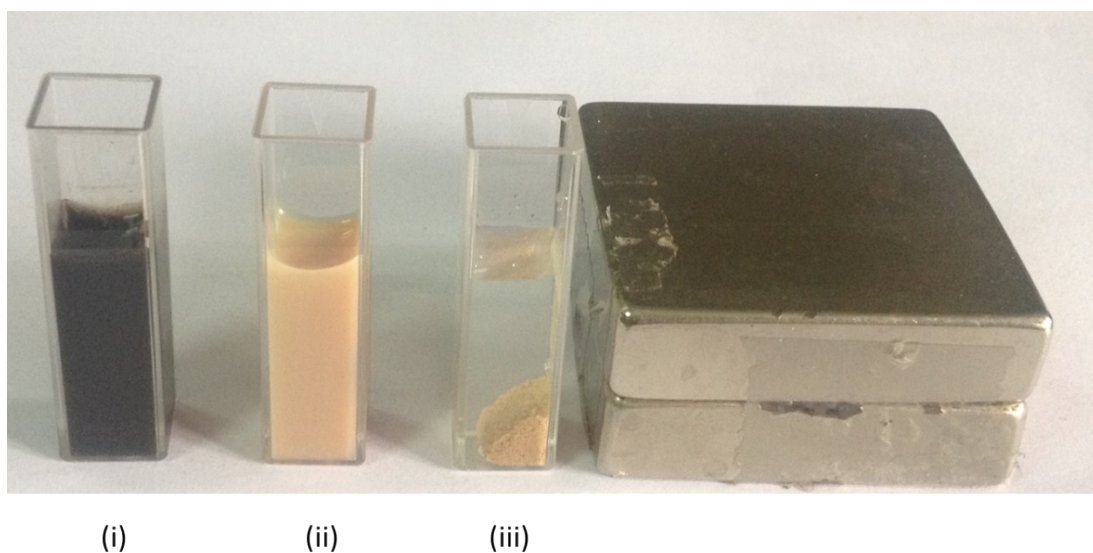

Fig. S4: Image of (i) iron oxide dispersion (ii) PFMNC-6 and magnetic response of polymeric nanoconstructs in the presence of a strong external block magnetic (1 Tesla)

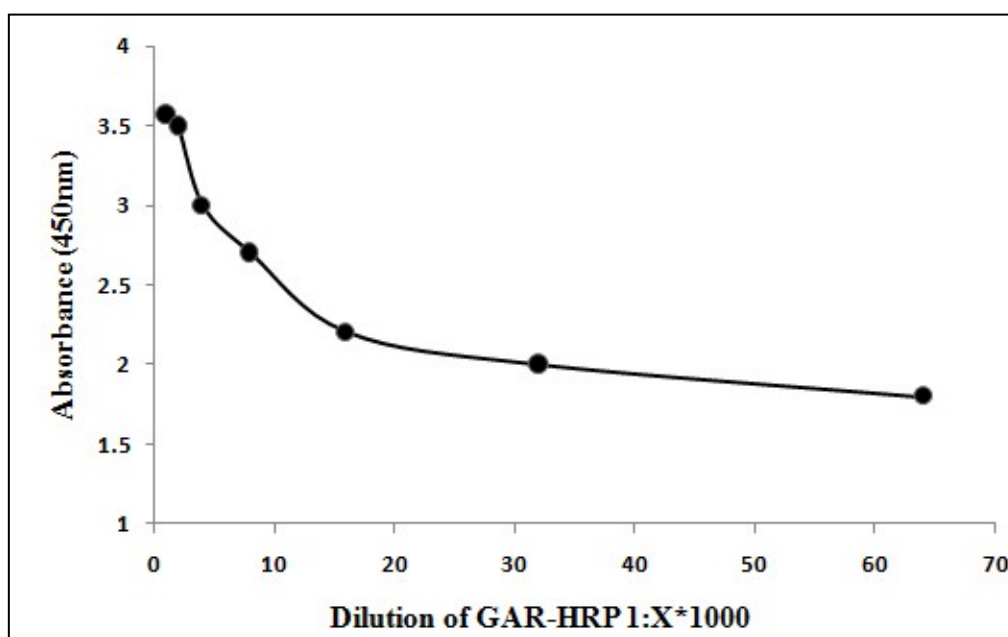

Fig. S5: Activity of various dilutions of GAR-HRP attached PFMNC-6
